# Supplementary material for: Subsets of symptomatic hand osteoarthritis in community-dwelling older adults in the United Kingdom: prevalence, inter-relationships, risk factor profiles and clinical characteristics at baseline and 3-years
Source: PubMed Central journal article supplement — Osteoarthritis Cartilage. 2013 Nov;21(11):1674–84. doi: 10.1016/j.joca.2013.08.004 (PMC3819994; doi:10.1016/j.joca.2013.08.004), 2013-11
Supplement: mmc1.pdf [file mmc1.pdf]

**Supplementary Figure 1. Flow diagram showing recruitment of CASHA and CASK study participants**

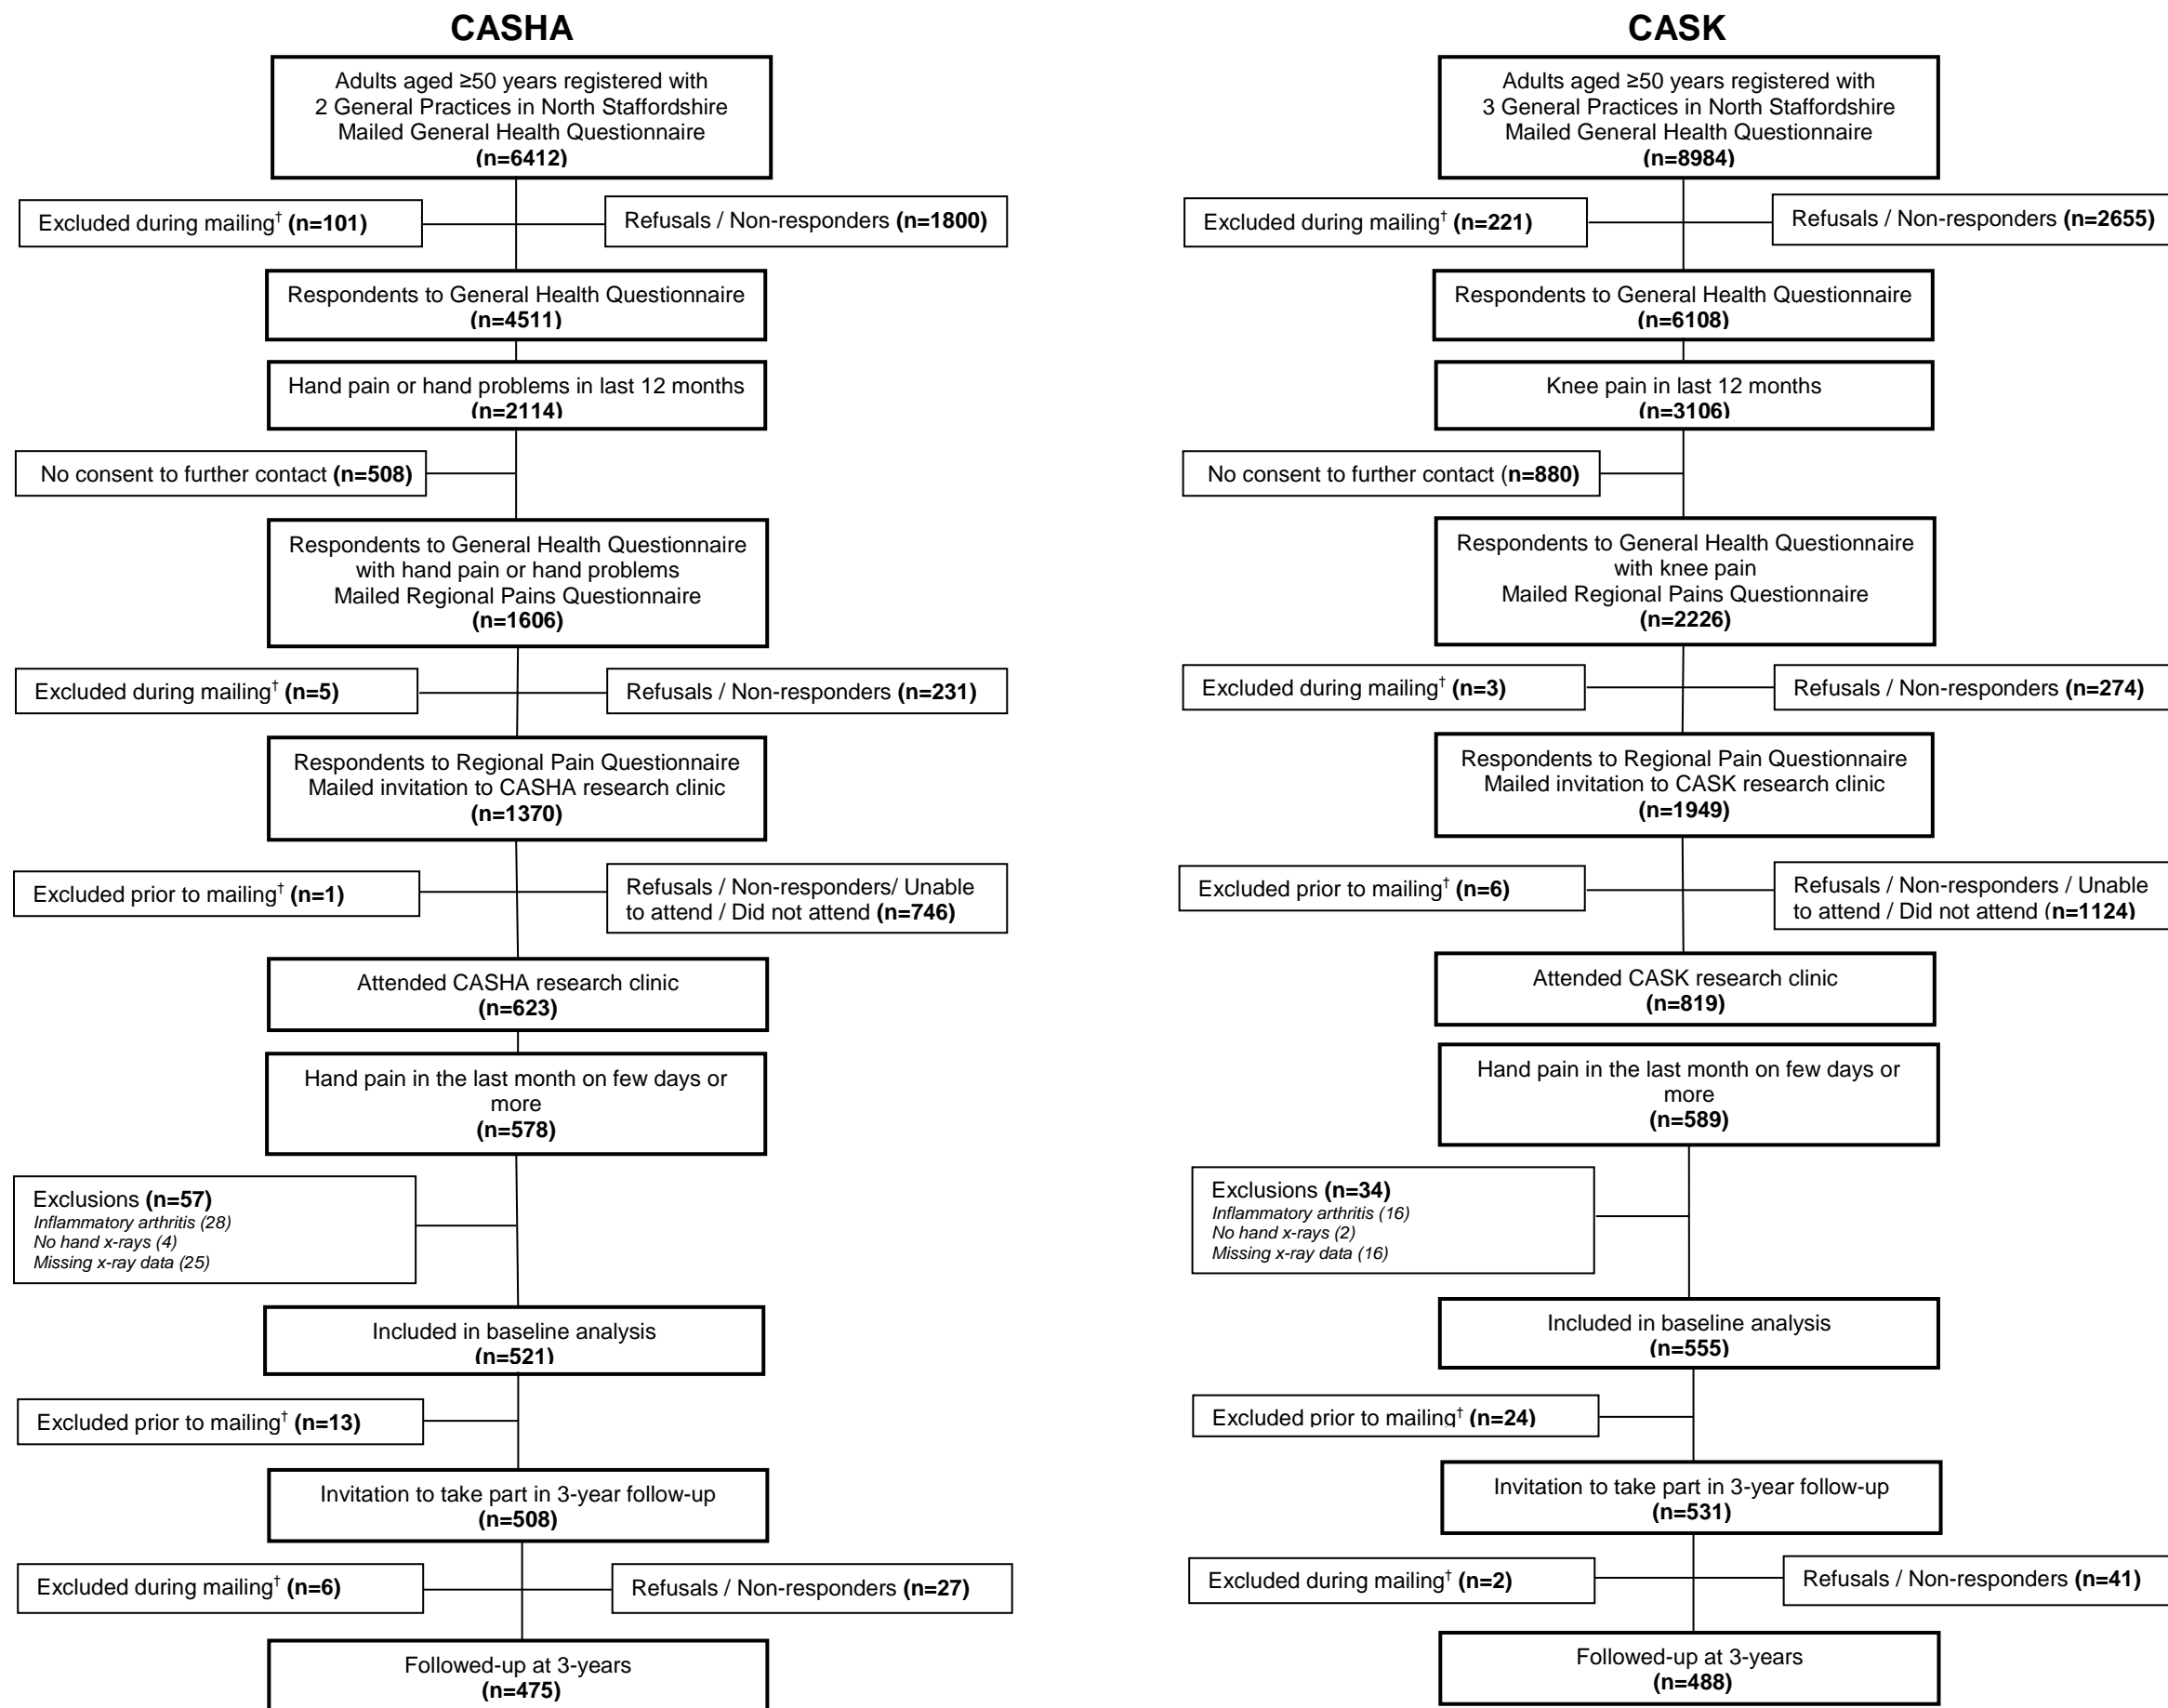

†Reason for exclusion prior to or during mailing include death, departure from the GP practice, incorrect address or certain health conditions that would make it difficult to complete the questionnaire including stroke, dementia or a severe mental health condition.
